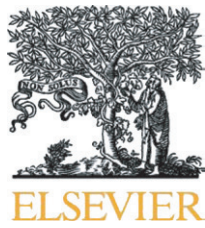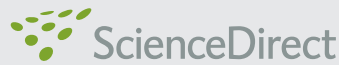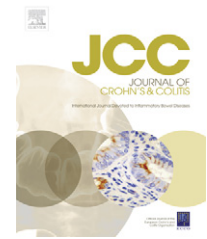

REVIEW ARTICLE

# Pulmonary abnormalities in inflammatory bowel disease

Dietlind Schleiermacher, Jörg C. Hoffmann\*

Abteilung Innere Medizin I, St. Marienkrankenhaus, Ludwigshafen, Germany

Received 31 August 2007; accepted 31 August 2007

**KEYWORDS**

Opportunistic infection;  
Drug induced;  
Bronchiectasis;  
Pneumonitis;  
Crohn's disease;  
Ulcerative colitis;

**Abstract**

Extraintestinal manifestations of inflammatory bowel disease (IBD) is a common clinical problem affecting up to half of all IBD patients; pulmonary disease, however, ranks among less common extraintestinal manifestations of IBD. Pulmonary disease in patients with IBD is most frequently drug induced due to treatment with sulfasalazine or mesalamine leading to eosinophilic pneumonia and fibrosing alveolitis or due to treatment with methotrexate leading to pneumonitis. Recently, various opportunistic infections have been shown to be a further important cause of pulmonary abnormalities in those IBD patients who are treated with immunosuppressants such as anti TNF- $\alpha$  monoclonal antibodies, methotrexate, azathioprine or calcineurin antagonists. In not drug related pulmonary disease a wide spectrum of disease entities ranging from small and large airway dysfunction to obstructive and interstitial lung disorders exist. Patients with lung disorders and inflammatory bowel disease should be evaluated for drug-induced lung disease and opportunistic infections prior to considering pulmonary disease as an extraintestinal manifestation of inflammatory bowel disease.

© 2007 European Crohn's and Colitis Organisation. Published by Elsevier B.V. All rights reserved.

**Contents**

|                                                                    |    |
|--------------------------------------------------------------------|----|
| 1. Introduction . . . . .                                          | 62 |
| 2. Drug related pulmonary abnormalities . . . . .                  | 62 |
| 3. Pulmonary abnormalities not related to drug treatment . . . . . | 64 |
| 3.1. Pulmonary function abnormalities . . . . .                    | 64 |
| 3.2. Upper airway abnormalities . . . . .                          | 64 |
| 3.3. Large airway abnormalities . . . . .                          | 64 |

\* Corresponding author. Abteilung Innere Medizin I, St. Marienkrankenhaus, Salzburger Straße 15, D-67067 Ludwigshafen, Germany. Tel.: +49 621 55012232; fax: +49 621 55012795.

E-mail address: [joerg.hoffmann@st-marienkrankenhaus.de](mailto:joerg.hoffmann@st-marienkrankenhaus.de) (J.C. Hoffmann).

|                                               |    |
|-----------------------------------------------|----|
| 3.4. Small airway abnormalities . . . . .     | 65 |
| 3.5. Interstitial disease . . . . .           | 65 |
| 3.6. Autoimmune disease . . . . .             | 65 |
| 3.7. Other pulmonary manifestations . . . . . | 65 |
| 4. Conclusions . . . . .                      | 66 |
| References . . . . .                          | 66 |

## 1. Introduction

Many patients with inflammatory bowel disease (IBD) suffer not only from bowel inflammation but also from extraintestinal manifestations such as pyoderma gangrenosum, erythema nodosum, dermatitis, aphthous stomatitis, uveitis, episcleritis, hepatitis, cholestatic liver disease, haemolytic anemia, arthritis, ankylosing spondylitis, pancreatitis, thyroiditis and pericarditis.<sup>1–3</sup> An association between pulmonary disease and IBD was recognized already about 40 years ago.<sup>2</sup> While the overall incidence of extraintestinal manifestations has been reported to range from 21% to 41%,<sup>4</sup> pulmonary disease in association with IBD seems to be uncommon.

The most frequent cause of pulmonary abnormalities in patients with IBD is drug-induced lung disease and more recently infectious forms of lung disease due to immunosuppression. Drug-induced lung disease occurs most often in patients treated with sulfasalazine or mesalamine leading to eosinophilic pneumonia and fibrosing alveolitis and methotrexate leading to pneumonitis.<sup>4</sup> Treatment with immunosuppressants such as anti TNF- $\alpha$  monoclonal antibodies, methotrexate, azathioprine or calcineurin antagonists (e.g. tacrolimus) can lead to various opportunistic infections. Therefore, drug-induced lung disease as well as opportunistic infections must be ruled out first before considering pulmonary abnormalities as extraintestinal manifestations.

In not drug-induced disease, a wide variety of pulmonary manifestations exist including small and large airway dysfunction.<sup>5,6</sup> In addition, obstructive and interstitial lung disorders have been described.<sup>2</sup> Case reports show a large spectrum of disease entities such as bronchial hyperresponsiveness,<sup>7</sup> bronchitis and bronchiectasis,<sup>8</sup> inflammatory tracheal stenosis,<sup>9</sup> interstitial pneumonitis<sup>10</sup> and bronchiolitis obliterans-organizing pneumonia.<sup>11</sup> Moreover, pulmonary abnormalities seem to be related to disease activity<sup>12</sup> and occur mainly years after the diagnosis of IBD, the incidence increasing with duration of disease.<sup>13</sup> Occasionally, pulmonary disease can precede the diagnosis of IBD.<sup>3</sup>

In this article we review the pulmonary manifestations which have been associated with IBD.

## 2. Drug related pulmonary abnormalities

Drug related pulmonary abnormalities occur due to treatment with sulfasalazine, mesalamine, corticosteroids, azathioprine, calcineurin antagonists, methotrexate or infliximab and can be divided into opportunistic pulmonary infections secondary to immunosuppression and drug-induced non-infectious lung disease (Table 1).

Both, sulfasalazine and mesalamine, can induce non-infectious lung disease which is not dose related and usually occurs after 2 to 6 months of therapy. Rarely, drug-induced

lung disease already becomes apparent after a few days of treatment or years after starting treatment.<sup>4</sup> The most frequent pulmonary pathology reported is eosinophilic pneumonia with infiltration of lung tissue with eosinophils and eosinophilia in the peripheral blood.<sup>14–20</sup> Eosinophilic pleural effusions can also occur.<sup>21,22</sup> The second most common pulmonary pathology upon sulfasalazine or mesalamine treatment is fibrosing alveolitis, which is a potentially lethal drug reaction. A small number of patients with IBD and alveolar fibrosis have been reported in the literature.<sup>23–30</sup> Treatment with corticosteroids and withdrawal of the drug have been shown to be successful.

Pulmonary symptoms in patients with eosinophilic pneumonia or fibrosing alveolitis are non-specific, the most common symptoms being dyspnea, cough, chest pain and fever.<sup>4</sup> Eosinophilia was reported in about 50% of patients.<sup>31</sup> Diffusion capacity is reduced in most patients and infiltrates can be seen on chest X-rays. Treatment consists in drug withdrawal and therapy with corticosteroids.<sup>4</sup>

Azathioprine and probably also 6-mercaptopurine rarely cause interstitial pneumonitis or bronchiolitis obliterans.<sup>32–34</sup> However, interstitial pneumonia can also be caused by infection with *Pneumocystis jiroveci* or *Mycobacterium xenopi* although this seems to be as rare as non-infectious lung disease with only three patients reported worldwide.<sup>35–37</sup>

Methotrexate can lead to a potentially lethal pneumonitis.<sup>38</sup> Pulmonary symptoms include dyspnea, fever and cough as well as hypoxemia and tachypnea. Chest X-rays usually show diffuse interstitial or mixed interstitial and alveolar infiltrates, pulmonary function tests reveal restrictive disease. Pneumonitis due to methotrexate therapy has not been reported in patients with Crohn disease, however over

**Table 1** Drug-induced pulmonary abnormalities in inflammatory bowel disease (IBD) due to treatment with sulfasalazine, mesalamine, methotrexate or infliximab

|                          |                                                                                                                                                                                                                                                                                                                                                                |
|--------------------------|----------------------------------------------------------------------------------------------------------------------------------------------------------------------------------------------------------------------------------------------------------------------------------------------------------------------------------------------------------------|
| Non-infectious cause     | Eosinophilic pneumonia<br>Eosinophilic pleura effusion<br>Fibrosing alveolitis<br>Pneumonitis                                                                                                                                                                                                                                                                  |
| Opportunistic infections | <i>Mycobacterium tuberculosis</i><br><i>Pneumocystis jiroveci</i> (carinii)<br><i>Listeria monocytogenes</i><br><i>Aspergillus fumigatus</i><br><i>Histoplasma capsulatum</i><br><i>Coccidioides immitis</i><br>Overwhelming infection with<br><i>Plasmodium falciparum</i><br><i>Cryptococcus neoformans</i><br>Cytomegalovirus<br><i>Nocardia asteroides</i> |

100 cases with this side effect of methotrexate treatment have been described in patients with rheumatoid arthritis.<sup>38</sup> Immunosuppression using methotrexate – similar to azathioprine – can also lead to opportunistic lung infections caused by Cytomegalovirus, *Cryptococcus*, *Nocardia*, *P. jiroveci* or *Mycobacterium tuberculosis*.<sup>39–42</sup> Even Epstein–Bar-virus-induced pulmonary lymphoma have been described.<sup>43</sup>

Infliximab, an anti-TNF- $\alpha$  monoclonal antibody (mAb), is increasingly used in patients with IBD. Recent data investigating the use of infliximab in patients with rheumatoid arthritis showed an increased risk of infection.<sup>44,45</sup> The incidence of infections was reported to be highest within 6 months after initiation of anti-TNF- $\alpha$  mAb therapy. Keane et al. report 70 cases of tuberculosis in patients treated with infliximab, 31% of which had pulmonary involvement.<sup>46</sup> Screening for tuberculosis prior to treatment initiation is mandatory and prophylactic tuberculostatic treatment is recommended if latent infection is found and anti-TNF- $\alpha$  mAb therapy is the only treatment option.<sup>47</sup> Further infections found in patients treated with TNF blockade include *Pneumocystis jiroveci* pneumonia,<sup>48,49</sup> histoplasmosis due to *His-*

*toplasma capsulatum*<sup>50–52</sup> and coccidioidomycosis due to *Coccidioides immitis*.<sup>53</sup> For diagnosis of *P. jiroveci* pneumonia bronchoscopy with broncho-alveolar lavage is necessary early in the course of the disease. The onset of symptoms of pneumonia has been described to be early after initiation of infliximab therapy with a mean of 21 days, moreover, the mortality rate has been reported to be high (27%).<sup>49</sup> Prophylaxis for *P. jiroveci* infection must be considered in all patients with double or triple immunosuppression as well as in those patients who have already had this infection. Importantly, also treatment with systemic corticosteroids have been reported to have more common infections with *P. jiroveci*, *Aspergillus*, and *Mycobacteria*.<sup>40</sup>

Several cases of *Listeria monocytogenes* infections associated with infliximab therapy in patients with Crohn's disease have been reported.<sup>54,55</sup> A further rare complication of infliximab treatment is overwhelming parasitemia with *Plasmodium falciparum*, which has been reported in one case.<sup>56</sup> Other infections associated with infliximab treatment include invasive aspergillosis.<sup>57,58</sup> Furthermore, a case of pneumonia due to *Cryptococcus neoformans* in a patient receiving infliximab has been reported.<sup>59</sup> Because of the

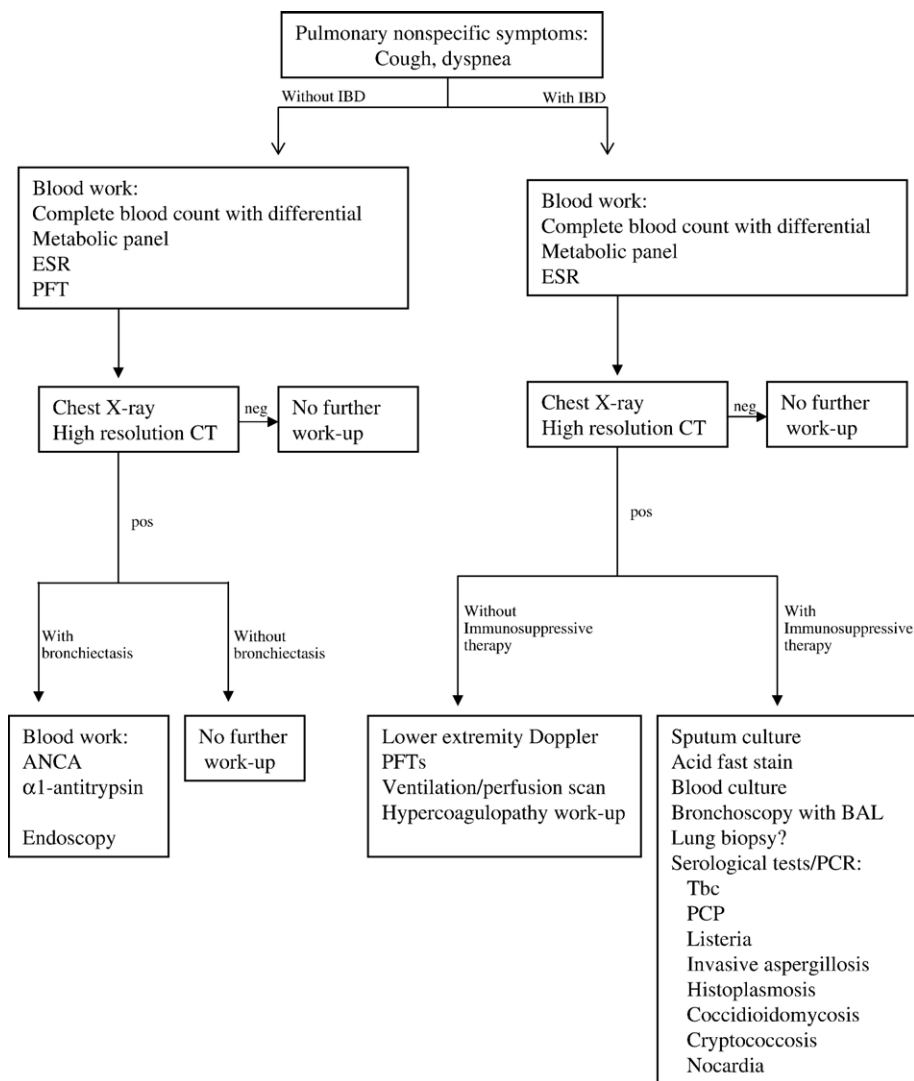

Figure 1 Flow chart for work-up of patients with pulmonary abnormalities in IBD.

multitude of case reports upon opportunistic infections in patients treated with infliximab one might think that most patients on infliximab might develop a lung infection at some point. This is clearly not the case and we can only assume at present that anti-TNF- $\alpha$  mAb seem to lead to a more severe immunosuppression particularly when used together with steroids and other immunosuppressants.

Cyclosporine may be used for treatment of steroid resistant ulcerative colitis. A case of *Nocardia asteroides* lung abscess in patient with ulcerative colitis treated with cyclosporine has been described.<sup>60</sup>

Since opportunistic infections of the lung and non-infectious pulmonary manifestations due to treatment with sulfasalazine, mesalamine or methotrexate are the most frequent cause of the pulmonary abnormalities in IBD, drug-induced lung disease and particularly opportunistic lung infections must always be ruled out first in these patients. For patients with IBD presenting with non-specific pulmonary symptoms we propose the diagnostic work up as demonstrated in Fig. 1.

### 3. Pulmonary abnormalities not related to drug treatment

When pulmonary abnormalities are not related to drug treatment various forms have been described in patients with IBD and in one single patient multiple sites in the lung can be involved. In this section we will discuss pulmonary function abnormalities first, thereafter various pulmonary manifestations according to their thoracic localisation (see Table 2), and finally autoimmune and other pulmonary

diseases associated with IBD which cannot be classified according to their localisation.

#### 3.1. Pulmonary function abnormalities

Various studies testing pulmonary function in patients with IBD have revealed a spectrum of abnormalities including restrictive disease, obstructive disease, bronchial hyperresponsiveness and hyperinflation as well as a decreased diffusion capacity of the lung. There is evidence that more than 50% of patients with ulcerative colitis have pulmonary function impairment without clinical or radiologic findings.<sup>61</sup> Only few studies have shown no difference in pulmonary function test between patients with and without IBD<sup>62</sup> and obstructive pulmonary disease has also been reported in patients with ulcerative colitis as compared to control subjects.<sup>63</sup> More frequently a decrease in diffusion capacity of the lung has been described in patients with IBD as compared to control subjects.<sup>64</sup> This phenomenon has been reported to be more accentuated during periods of active disease as compared to periods of remission.<sup>5</sup> Herrlinger et al. also found an influence of disease activity but did not emphasize measurement of diffusion capacity as a specific marker for disease activity since values for forced expiratory volume in 1 sec and inspiratory vital capacity were also decreased during periods of active disease.<sup>65</sup> Studies assessing functional residual capacity in patients with Crohn disease have shown evidence of hyperinflation<sup>66,67</sup> and were also able to show an association between active disease and hyperinflation. Other investigations have revealed bronchial hyperresponsiveness in patients with IBD, although further studies were not able to confirm these results.<sup>68,69</sup>

#### 3.2. Upper airway abnormalities

Only few studies report involvement of the upper airways in overall 15 patients with IBD.<sup>3,4</sup> Symptoms described in these patients include shortness of breath, cough and dysphonia. The diagnosis of upper airway stenosis can be made by radiologic examinations, pulmonary functions testing showing evidence of pulmonary obstruction and laryngoscopic examination. In all patients with upper airway involvement there was evidence of tracheal disease, but laryngeal and glottic involvement was also reported. Rickli et al. describes a case of severe inflammatory upper airway stenosis due to pseudotumorous swelling of the larynx, trachea and main bronchi.<sup>70</sup>

#### 3.3. Large airway abnormalities

Bronchiectasis is the most common pulmonary disease found in IBD patients. Bronchiectasis is an irreversible dilation of bronchioles which leads to coughing and abnormal amounts of sputum. This pulmonary abnormality has been reported in up to 66% of patients with IBD and pulmonary disease.<sup>3</sup> The second most common large airway disease in IBD patients is chronic bronchitis, further abnormalities include suppurative large airway disease and acute bronchitis.

Though an association between IBD and bronchiectasis has been reported in various studies, the pathogenesis still remains unclear. Histological examination of bronchial and colonic tissue shows similar changes with non-specific inflammation. Butland et al. propose an autoimmune process

**Table 2** Pulmonary abnormalities reported in association with IBD without drug-induced disease

|                                  |                                               |
|----------------------------------|-----------------------------------------------|
| Pulmonary function abnormalities | Restrictive                                   |
|                                  | Obstructive                                   |
|                                  | Diffusion abnormalities                       |
|                                  | Bronchial hyperresponsiveness                 |
| Upper airways                    | Hyperinflation                                |
|                                  | Epiglottitis                                  |
| Large airways                    | Tracheobronchitis                             |
|                                  | Bronchiectasis                                |
|                                  | Acute/chronic bronchitis                      |
| Small airways                    | Chronic bronchial suppuration                 |
|                                  | Bronchiolitis                                 |
|                                  | Bronchiolitis obliterans                      |
|                                  | Bronchiolitis obliterans organizing pneumonia |
| Interstitial disease             | Nonspecific interstitial pneumonia            |
|                                  | Fibrosing alveolitis                          |
|                                  | Eosinophilic pneumonia                        |
| Autoimmune disease               | Wegener granulomatosis                        |
|                                  | Pulmonary vasculitis                          |
|                                  | Churg–Strauss syndrome                        |
|                                  | Microscopic polyangitis                       |
| Other pulmonary manifestations   | Necrobiotic nodules                           |
|                                  | Pleuritis                                     |
|                                  | Fistulae (colobronchial, esophagopulmonary)   |

since most of their patients had a positive family history of autoimmune disease, positive antinuclear antibodies and anti-smooth-muscle antibodies.<sup>71</sup> Kirsner et al. propose that common antigens synthesize both the lung and gut associated lymphoid tissue and that this can lead to a similar inflammatory response in both.<sup>72,73</sup>

Therapy of pulmonary abnormalities in patients with IBD has been described in case reports. Surgery of the colon is not recommended for treatment of airway disease, however, inhaled or systemic corticosteroids are recommended as first line therapy.<sup>2,70,74</sup> Ineffectiveness of inhaled corticosteroids may be due to airways filled with inspissated secretions in which case either topical corticosteroids via BAL or systemic corticosteroids are recommended.<sup>73</sup>

### 3.4. Small airway abnormalities

Involvement of the small airways in patients with IBD has been detected by high-resolution computed tomography.<sup>8</sup> These abnormalities seem to occur earlier in the course of the disease and at a younger age than large airway disease.<sup>75</sup> Moreover, small airway disease is more frequently apparent before the onset of IBD than other airway diseases.<sup>76</sup> Bronchiolitis is the most frequently detected disease among small airway diseases.<sup>2,75–79</sup> Histological examination of pulmonary tissue shows peribronchiolar granuloma formation and, less frequently, peribronchiolar inflammation with neutrophils or lymphocytes and plasma cells, concentric small airway fibrosis and diffuse panbronchiolitis.<sup>3</sup>

Bronchiolitis obliterans organizing pneumonia (BOOP) has also been described in patients with IBD.<sup>64,80,81</sup> BOOP can be associated with other autoimmune diseases e.g. rheumatoid arthritis, lupus and Wegener granulomatosis. Presenting symptoms with cough and dyspnea are non-specific. Systemic steroids are recommended for treatment but BOOP may also remit without treatment in a minority of cases.<sup>3,4</sup>

### 3.5. Interstitial disease

Interstitial lung disease in patients with IBD is usually due to drug therapy with mesalamine and sulfasalazine, less common azathioprine or methotrexate. A small number of cases with interstitial lung disease have been described which were not related to drug therapy. The pathology described in these cases include nongranulomatous interstitial diffuse lung disease, mild to severe interstitial fibrosis and desquamative interstitial pneumonitis.<sup>82–87</sup> Patients with IBD and interstitial lung disease were treated with steroids or immunosuppressive agents such as cyclosporine and azathioprine. In one case where no response could be achieved with these drugs mycophenolate was used successfully.<sup>88</sup>

### 3.6. Autoimmune disease

A small number of cases with IBD and pulmonary vasculitis have been reported.<sup>2,89–95</sup> Pulmonary disease in these patients was not due to drug reactions. Symptoms with cough and dyspnea were non-specific and chest X-ray films showed bilateral infiltrates or nodules. Other entities include Churg–Strauss syndrome,<sup>96</sup> microscopic polyangiitis and Wegener granulomatosis.<sup>97</sup> In most cases corticosteroids were administered

for treatment. On the other hand, intestinal involvement of Wegener granulomatosis, a pulmonary vasculitis, has been reported in few cases.<sup>98–106</sup> Symptoms such as bloody diarrhea, abdominal pain and intestinal perforation have been described, and biopsy is essential for diagnosis.

Antineutrophil cytoplasmic antibodies are found in many forms of vasculitis. Whereas p-ANCA is present in patients with microscopic polyarteritis and other autoimmune diseases, ANCA with a snowdrift pattern has been detected in patients with ulcerative colitis.<sup>107,108</sup> This points towards a common autoimmune component in both diseases.

### 3.7. Other pulmonary manifestations

Necrobiotic nodules are a very rare pulmonary abnormality in patients with IBD and have been reported in two cases.<sup>109,110</sup>

A small number of cases with pleuritis, i.e. pleural effusion, have been described in patients with IBD.<sup>2,111–113</sup> Symptoms in these patients, who are usually young, male and have ulcerative colitis, included dyspnea and chest pain.<sup>3</sup> Mostly pleural effusions are unilateral and, when examined, prove to be exudates. Treatment with corticosteroids was reported to be successful. Pericardial involvement has also been reported, and in an even smaller number of cases both pleural and pericardial involvement has been described.

Patients with Crohn disease can develop fistulae to any neighbouring structure. Patients with colobronchial fistulae and ileobronchial fistulae have been reported.<sup>114–119</sup> These patients present with pneumonia and pleural effusions. Sputum culture with evidence of enteric pathogens points towards the diagnosis of fistulae. Usually lung surgery is necessary for treatment. In very rare cases of esophageal involvement in patients with Crohn disease pulmonary fistulae have been reported.<sup>120–122</sup> In these patients surgical treatment is also necessary. When patients with Crohn disease develop chronic pneumonia and sputum culture shows enteric pathogens pulmonary fistulas can be the underlying cause.

Sarcoidosis and Crohn disease are both idiopathic granulomatous diseases which have similar ocular, dermatologic and joint manifestations in common. An increased CD4:CD8 ratio has been found in alveolar lavage from patients with sarcoidosis and in patients with Crohn disease.<sup>123,124</sup> These findings point towards a possible common pathogenesis of both diseases. 53 cases of patients with sarcoidosis and Crohn disease have been reported in a review of the literature of 2007.<sup>3</sup> Most of these cases were treated with corticosteroids, but recent reports show that treatment with infliximab (anti-TNF- $\alpha$ ) can be successful in the treatment of Crohn disease and sarcoidosis as well.<sup>125,126</sup> This finding further supports a common pathogenesis of both diseases.

Alpha-1-antitrypsin deficiency leads to pulmonary emphysema and hepatic dysfunction. A small number of patients with  $\alpha_1$ -antitrypsin deficiency and IBD have been reported,<sup>127</sup> and studies analysing abnormal  $\alpha_1$ -antitrypsin alleles in patients with IBD have shown a higher prevalence of PiZ carriers among patients with IBD as compared to the general population.<sup>128</sup> PiZ carrier status was associated with increased severities of colitis and an effect of smoking with local tissue damage in the gastrointestinal tract via changed neutrophil elastase regulation in  $\alpha_1$ -antitrypsin deficiency was suggested.<sup>3</sup>

Patients with IBD have an increased risk of thromboembolic disease. Both arterial and venous thrombosis have been described with an incidence between 1 and 8%.<sup>129–135</sup> Deep venous thrombosis and pulmonary emboli (see Fig. 2) have been observed in patients with IBD, but IBD itself has also been associated with a hypercoagulable state since deep venous thrombosis has been described in patients with inactive IBD. This finding points towards a thrombotic risk in patients with IBD which is not related to disease activity or therapy. However, the pathogenesis of this increased thrombotic risk in patients with IBD remains unclear. The prevalence of activated protein C resistance or factor V Leiden mutation is not higher in patients with IBD than in the general population.<sup>131</sup> Anticardiolipin antibody levels were shown to be elevated in patients with IBD, but seem to play no role in the pathogenesis of thromboembolic disease in this setting.<sup>136</sup> Hyperhomocysteinemia as a risk factor for thrombosis which can be due to genetic factors, medications such as corticosteroids, methotrexate and sulfasalazine and nutritional deficiencies has been described in patients with IBD.<sup>137</sup> Other laboratory markers indicating an activation of the coagulation system have been found in some patients with IBD, but the significance of these findings is not clear. An exact molecular mechanism for the hypercoagulable state in patients with IBD, however, needs further investigations.

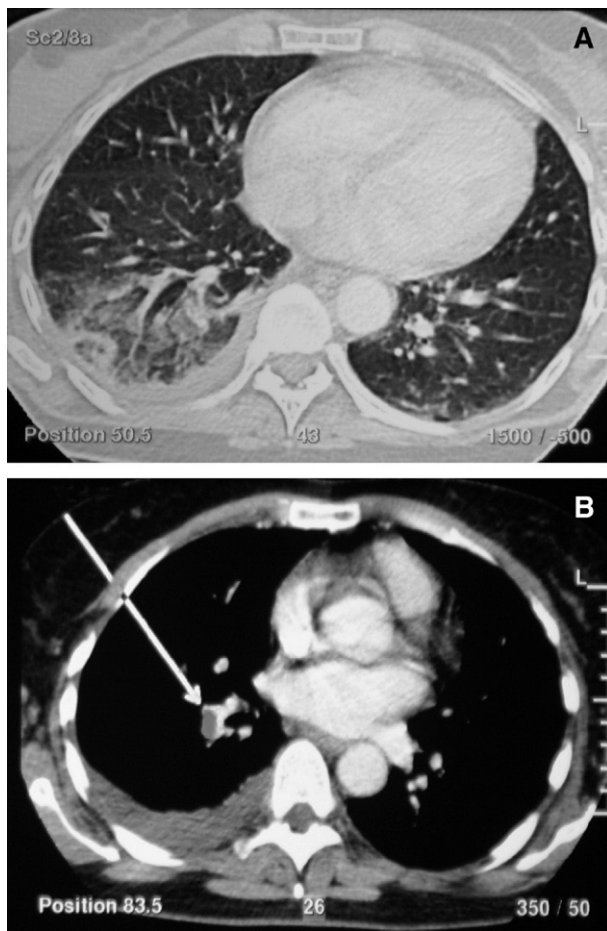

**Figure 2** Thromboembolism in IBD. Shown is TC scan images of a patient with a history of ulcerative colitis presenting with a dorso-lateral pneumonia (A) due to pulmonary emboli as shown in (B).

Asthma has been shown to have a higher prevalence among patients with IBD as compared to control subjects.<sup>138</sup> Furthermore, a more severe course of asthma has been described in patients with IBD. This was shown in a study by Kanazawa et al., where patients with ulcerative colitis and asthma had increased airway obstruction and a 20% decrease of FEV1 on metacholine challenge as compared to patients with asthma and without ulcerative colitis.<sup>139</sup> Increased inflammation, increased vascular endothelial growth activity and vascular permeability in patients with asthma and ulcerative colitis was proposed.

#### 4. Conclusions

Pulmonary abnormalities in patients with inflammatory bowel disease can be divided into frequent drug related and not drug related disorders.

Drug related pulmonary abnormalities include disorders which are directly induced by sulfasalazine, mesalamine, methotrexate or rarely azathioprine and opportunistic lung infections with pulmonary manifestations due to immunosuppressive treatment with anti TNF- $\alpha$  monoclonal antibodies, methotrexate, azathioprine or calcineurin antagonists. In patients with IBD, screening for tuberculosis prior to treatment is mandatory and prophylactic tuberculostatic treatment is recommended if anti TNF- $\alpha$  monoclonal antibodies are the only treatment option. Prophylactic treatment of *P. jiroveci* must be considered in patients with double or triple immunosuppression and in those patients who have already had this infection.

Not drug related pulmonary abnormalities may be considered as true extraintestinal manifestations of inflammatory bowel disease and include a wide variety of disease entities. The most common abnormality of these is bronchiectasis.

Non-infectious lung disorders due to treatment with sulfasalazine, mesalamine or methotrexate and opportunistic infections of the lung must be ruled out first before extraintestinal manifestations of inflammatory bowel disease are considered.

#### References

- Greenstein AJ, Janowitz HD, Sachar DB. The extra-intestinal complications of Crohn's disease and ulcerative colitis: a study of 700 patients. *Medicine (Baltimore)* Sep 1976;**55**(5):401–12.
- Camus P, Piard F, Ashcroft T, Gal AA, Colby TV. The lung in inflammatory bowel disease. *Medicine (Baltimore)* May 1993;**72**(3):151–83 [Review].
- Black H, Mendoza M, Murin S. Thoracic manifestations of inflammatory bowel disease. *Chest* Feb 2007;**131**(2):524–32.
- Storch I, Sachar D, Katz S. Pulmonary manifestations of inflammatory bowel disease. *Inflamm Bowel Dis* Mar 2003;**9**(2):104–15.
- Tzanakis N, Bourous D, Samiou M, et al. Lung function in patients with inflammatory bowel disease. *Respir Med* Mar 1998;**92**(3):516–22.
- Spira A, Grossman R, Balter M. Large airway disease associated with inflammatory bowel disease. *Chest* Jun 1998;**113**(6):1723–6.
- Mansi A, Cucchiara S, Greco L, et al. Bronchial hyperresponsiveness in children and adolescents with Crohn's disease. *Am J Respir Crit Care Med* Mar 2000;**161**(3 Pt 1):1051–4.
- Mahadeva R, Walsh G, Flower CD, Shneerson JM. Clinical and radiological characteristics of lung disease in inflammatory bowel disease. *Eur Respir J* Jan 2000;**15**(1):41–8.

9. Kuzniar T, Sleiman C, Brugiére O, et al. Severe tracheobronchial stenosis in a patient with Crohn's disease. *Respir J Jan 2000*;15(1):209–12.
10. Le Roux P, Bouloche J, Briquet MT, Guyonnaud CD, Le Luyer B. Respiratory manifestation of Crohn's disease. Apropos of a case in an adolescent. *Rev Mal Respir 1995*;12(1):59–61 [Article in French].
11. Mahajan L, Kay M, Wyllie R, Steffen R, Goldfarb J. Ulcerative colitis presenting with bronchiolitis obliterans organizing pneumonia in a pediatric patient. *Am J Gastroenterol Nov 1997*;92(11):2123–4.
12. Munck A, Murciano D, Pariente R, Cezard JP, Navarro J. Latent pulmonary function abnormalities in children with Crohn's disease. *Eur Respir J Mar 1995*;8(3):377–80.
13. Veloso FT, Carvalho J, Magro F. Immune-related systemic manifestations of inflammatory bowel disease. A prospective study of 792 patients. *J Clin Gastroenterol Jul 1996*;23(1):29–34.
14. Pascual-Lledo JF, Calvo-Bonachera J, Carrasco-Miras F, Sanchez-Martinez H. Interstitial pneumonitis due to mesalamine. *Ann Pharmacother Apr 1997*;31(4):499.
15. Honeybourne D. Mesalazine toxicity. *BMJ Feb 19 1994*;308(6927):533–4.
16. Tanigawa K, Sugiyama K, Matsuyama H, et al. Mesalazine-induced eosinophilic pneumonia. *Respiration 1999*;66(1):69–72.
17. Sviri S, Gafanovich I, Kramer MR, Tsvang E, Ben-Chetrit E. Mesalamine-induced hypersensitivity pneumonitis. A case report and review of the literature. *J Clin Gastroenterol Jan 1997*;24(1):34–6.
18. Constantiniadis KA. Letter: Eosinophilic pneumonia: an unusual side effect of therapy with salicylazosulapyridine. *Chest Aug 1976*;70(2):315–6.
19. Scherpenisse J, van der Valk PD, van den Bosch JM, van Hees PA, Nadorp JH. Olsalazine as an alternative therapy in a patient with sulfasalazine-induced eosinophilic pneumonia. *J Clin Gastroenterol Apr 1988*;10(2):218–20.
20. Cazzadori A, Braggio P, Bontempini L. Salazopyrin-induced eosinophilic pneumonia. *Respiration 1985*;47(2):158–60.
21. Sesin GP, Mucciardi N, Almeida S. Mesalamine-associated pleural effusion with pulmonary infiltration. *Am J Health Syst Pharm Nov 1 1998*;55(21):2304–5.
22. Trisolini R, Dore R, Biagi F, et al. Eosinophilic pleural effusion due to mesalamine Report of a rare occurrence. *Sarcoidosis Vasc Diffuse Lung Dis Oct 2000*;17(3):288–91.
23. Boyd O, Gibbs AR, Smith AP. Fibrosing alveolitis due to sulphasalazine in a patient with rheumatoid arthritis. *Br J Rheumatol Jun 1990*;29(3):222–4.
24. Lazaro MT, Garcia-Tejero MT, Diaz-Lobato S. Mesalamine-induced lung disease. *Arch Intern Med Feb 24 1997*;157(4):462.
25. Williams T, Eidus L, Thomas P. Fibrosing alveolitis, bronchiolitis obliterans, and sulfasalazine therapy. *Chest Jun 1982*;81(6):766–8.
26. Davies D, MacFarlane A. Fibrosing alveolitis and treatment with sulphasalazine. *Gut Mar 1974*;15(3):185–8.
27. Leino R, Liippo K, Ekfors T. Sulphasalazine-induced reversible hypersensitivity pneumonitis and fatal fibrosing alveolitis: report of two cases. *J Intern Med Jun 1991*;229(6):553–6.
28. Wang KK, Bowyer BA, Fleming CR, Schroeder KW. Pulmonary infiltrates and eosinophilia associated with sulfasalazine. *Mayo Clin Proc May 1984*;59(5):343–6.
29. Welte T, Hamm H, Fabel H. Mesalazine alveolitis. *Lancet Nov 16 1991*;338(8777):1273.
30. Sigvaldason A, Sorenson S. Interstitial pneumonia due to sulfasalazine. *Eur J Respir Dis Apr 1983*;64(3):229–33.
31. Parry SD, Barbatzas C, Peel ET, Barton JR. Sulphasalazine and lung toxicity. *Eur Respir J Apr 2002*;19(4):756–64.
32. Nagy F, Molnar T, Makula E, et al. A case of interstitial pneumonitis in a patient with ulcerative colitis treated with azathioprine. *World J Gastroenterol Jan 14 2007*;13(2):316–9.
33. Ananthkrishnan AN, Attila T, Otterson MF, et al. Severe pulmonary toxicity after azathioprine/6-mercaptopurine initiation for the treatment of inflammatory bowel disease. *J Clin Gastroenterol Aug 2007*;41(7):682–8.
34. Bedrossian CW, Sussman J, Conklin RH, Kahan B. Azathioprine-associated interstitial pneumonitis. *Am J Clin Pathol Aug 1984*;82(2):148–54.
35. Cohen ML, Weiss EB. Pneumocystitis carinii pneumonia: percutaneous lung biopsy and review of literature. *Chest Aug 1971*;60(2):195–9.
36. Cohen ML, Weiss EB. Pneumocystitis carinii pneumonia: percutaneous lung biopsy and review of literature. *Chest Aug 1971*;60(2):195–9.
37. Majoor CJ, Schreurs AJ, Weers-Pothoff G. *Mycobacterium xenopi* infection in an immunosuppressed patient with Crohn's disease. *Thorax Jul 2004*;59(7):631–2.
38. Imokawa S, Colby TV, Leslie KO, Helmers RA. Methotrexate pneumonitis: review of the literature and histopathological findings in nine patients. *Eur Respir J Feb 2000*;15(2):373–81.
39. Kaneko Y, Suwa A, Ikeda Y, Hirakata M. *Pneumocystis jiroveci* pneumonia associated with low-dose methotrexate treatment for rheumatoid arthritis: report of two cases and review of the literature. *Mod Rheumatol 2006*;16(1):36–8.
40. White DA. Drug-induced pulmonary infection. *Clin Chest Med Mar 2004*;25(1):179–87.
41. Iikuni N, Kitahama M, Ohta S, Okamoto H, Kamatani N, Nishinarita M. Evaluation of *Pneumocystis* pneumonia infection risk factors in patients with connective tissue disease. *Mod Rheumatol 2006*;16(5):282–8.
42. di Girolamo C, Pappone N, Melillo E, Rengo C, Giuliano F, Melillo G. Cavitory lung tuberculosis in a rheumatoid arthritis patient treated with low-dose methotrexate and steroid pulse therapy. *Br J Rheumatol Oct 1998*;37(10):1136–7.
43. Ebeo CT, Girish MR, Byrd RP, Roy TM, Mehta JB. Methotrexate-induced pulmonary lymphoma. *Chest Jun 2003*;123(6):2150–3.
44. Curtis JR, Patkar N, Xie A, et al. Risk of serious bacterial infections among rheumatoid arthritis patients exposed to tumor necrosis factor alpha antagonists. *Arthritis Rheum Apr 2007*;56(4):1125–33.
45. Winthrop KL. Serious infections with antirheumatic therapy: are biologicals worse? *Ann Rheum Dis Nov 2006*;65(Suppl 3):iii54–7.
46. Keane J, Gershon S, Wise RP, et al. Tuberculosis associated with infliximab, a tumor necrosis factor alpha-neutralizing agent. *N Engl J Med Oct 11 2001*;345(15):1098–104.
47. Winthrop KL. Risk and prevention of tuberculosis and other serious opportunistic infections associated with the inhibition of tumor necrosis factor. *Nat Clin Pract Rheumatol Nov 2006*;2(11):602–10.
48. Imaizumi K, Sugishita M, Usui M, Kawabe T, Hashimoto N, Hasegawa Y. Pulmonary infectious complications associated with anti-TNFalpha therapy (infliximab) for rheumatoid arthritis. *Intern Med 2006*;45(10):685–8.
49. Kaur N, Mahl TC. *Pneumocystis jiroveci* (carinii) pneumonia after infliximab therapy: a review of 84 cases. *Dig Dis Sci Jun 2007*;52(6):1481–4.
50. Wood KL, Hage CA, Knox KS, et al. Histoplasmosis after treatment with anti-tumor necrosis factor-alpha therapy. *Am J Respir Crit Care Med May 1 2003*;167(9):1279–82.
51. Lee JH, Slifman NR, Gershon SK, et al. Life-threatening histoplasmosis complicating immunotherapy with tumor necrosis factor alpha antagonists infliximab and etanercept. *Arthritis Rheum Oct 2002*;46(10):2565–70.
52. Nakelchik M, Mangino JE. Reactivation of histoplasmosis after treatment with infliximab. *Am J Med Jan 2002*;112(1):78.
53. Dweik M, Baethge BA, Duarte AG. Coccidioidomycosis pneumonia in a nonendemic area associated with infliximab. *South Med J May 2007*;100(5):517–8.
54. Morelli J, Wilson FA. Does administration of infliximab increase susceptibility to listeriosis? *Am J Gastroenterol Mar 2000*;95(3):841–2.

55. Kesteman T, Yombi JC, Gigi J, Durez P. Listeria infections associated with infliximab: case reports. *Clin Rheumatol*. doi:10.1007/s10067-007-0660-8.
56. Geraghty EM, Ristow B, Gordon SM, Aronowitz P. Overwhelming parasitemia with *Plasmodium falciparum* infection in a patient receiving infliximab therapy for rheumatoid arthritis. *Clin Infect Dis* May 15 2007;44(10):e82–4.
57. Warris A, Bjorneklett A, Gaustad P. Invasive pulmonary aspergillosis associated with infliximab therapy. *N Engl J Med* Apr 5 2001;344(14):1099–100.
58. Alderson JW, Van Dinter Jr TG, Opatowsky MJ, Burton EC. Disseminated aspergillosis following infliximab therapy in an immunosuppressed patient with Crohn's disease and chronic hepatitis C: a case study and review of the literature. *MedGenMed* Sep 21 2005;7(3):7.
59. Shrestha RK, Stoller JK, Honari G, Procop GW, Gordon SM. Pneumonia due to *Cryptococcus neoformans* in a patient receiving infliximab: possible zoonotic transmission from a pet cockatiel. *Respir Care* Jun 2004;49(6):606–8.
60. Stack WA, Richardson PD, Logan RP, Mahida YR, Hawkey CJ. *Nocardia asteroides* lung abscess in acute ulcerative colitis treated with cyclosporine. *Am J Gastroenterol* Jul 2001;96(7):2255–6.
61. Kuzela L, Vavrecka A, Prikazska M, et al. Pulmonary complications in patients with inflammatory bowel disease. *Hepatogastroenterology* May–Jun 1999;46(27):1714–9.
62. Johnson NM, Mee AS, Jewell DP, Clarke SW. Pulmonary function in inflammatory bowel disease. *Digestion* 1978;18(5–6):416–8.
63. Godet PG, Cowie R, Woodman RC, Sutherland LR. Pulmonary function abnormalities in patients with ulcerative colitis. *Am J Gastroenterol* Jul 1997;92(7):1154–6.
64. Heatley RV, Thomas P, Prokipchuk EJ, Gaudie J, Sieniewicz DJ, Bienenstock J. Pulmonary function abnormalities in patients with inflammatory bowel disease. *Q J Med* Summer 1982;51(203):241–50.
65. Herrlinger KR, Noftz MK, Dalhoff K, Ludwig D, Stange EF, Fellermann K. Alterations in pulmonary function in inflammatory bowel disease are frequent and persist during remission. *Am J Gastroenterol* Feb 2002;97(2):377–81.
66. Douglas JG, McDonald CF, Leslie MJ, Gillon J, Crompton GK, McHardy GJ. Respiratory impairment in inflammatory bowel disease: does it vary with disease activity? *Respir Med* Sep 1989;83(5):389–94.
67. Pasquis P, Colin R, Denis P, Baptiste P, Galmiche JP, Hecketsweiler P. Transient pulmonary impairment during attacks of Crohn's disease. *Respiration* 1981;41(1):56–9.
68. Ceyhan BB, Karakurt S, Cevik H, Sungur M. Bronchial hyperreactivity and allergic status in inflammatory bowel disease. *Respiration* Jan–Feb 2003;70(1):60–6.
69. Louis E, Louis R, Drion V, et al. Increased frequency of bronchial hyperresponsiveness in patients with inflammatory bowel disease. *Allergy* Sep 1995;50(9):729–33.
70. Rickli H, Fretz C, Hoffman M, Walser A, Knoblauch A. Severe inflammatory upper airway stenosis in ulcerative colitis. *Eur Respir J* Oct 1994;7(10):1899–902.
71. Butland RJ, Cole P, Citron KM, Turner-Warwick M. Chronic bronchial suppuration and inflammatory bowel disease. *Q J Med* 1981;50(197):63–75.
72. Kirsner JB, Shorter RG. Recent developments in "nonspecific" inflammatory bowel disease (first of two parts). *N Engl J Med* Apr 1 1982;306(13):775–85.
73. Cohen M, Sahn SA. Bronchiectasis in systemic diseases. *Chest* Oct 1999;116(4):1063–74 [Review].
74. Higenbottam T, Cochrane GM, Clark TJ, Turner D, Millis R, Seymour W. Bronchial disease in ulcerative colitis. *Thorax* Aug 1980;35(8):581–5.
75. Ward H, Fisher KL, Waghray R, Wright JL, Card SE, Cockcroft DW. Constrictive bronchiolitis and ulcerative colitis. *Can Respir J* Mar–Apr 1999;6(2):197–200.
76. Desai SJ, Gephardt GN, Stoller JK. Diffuse panbronchiolitis preceding ulcerative colitis. *Chest* Jun 1989;95(6):1342–4.
77. Kraft SC, Earle RH, Roesler M, Esterly JR. Unexplained bronchopulmonary disease with inflammatory bowel disease. *Arch Intern Med* Apr 1976;136(4):454–9.
78. Hilling GA, Robertson DA, Chalmers AH, Rigby HS. Unusual pulmonary complication of ulcerative colitis with a rapid response to corticosteroids: case report. *Gut* Jun 1994;35(6):847–8.
79. Vandenaspl O, Casel S, Delos M, Trigaux JP, Melange M, Marchand E. Granulomatous bronchiolitis associated with Crohn's disease. *Am J Respir Crit Care Med* Nov 1998;158(5 Pt 1):1676–9.
80. Haralambou G, Teirstein AS, Gil J, Present DH. Bronchiolitis obliterans in a patient with ulcerative colitis receiving mesalamine. *Mt Sinai J Med* Nov 2001;68(6):384–8.
81. Veloso FT, Rodrigues H, Aguiar MM. Bronchiolitis obliterans in ulcerative colitis. *J Clin Gastroenterol* Dec 1994;19(4):339–41.
82. Hotermans G, Benard A, Guenanen H, Demarcq-Delerue G, Malart T, Wallaert B. Nongranulomatous interstitial lung disease in Crohn's disease. *Eur Respir J* Feb 1996;9(2):380–2.
83. Meadway J. Ulcerative colitis, colitic spondylitis and associated apical pulmonary fibrosis. *Proc R Soc Med* May 1974;67(5):324–5.
84. McKee AL, Rajapaksa A, Kalish PE, Pitchumoni CS. Severe interstitial pulmonary fibrosis in a patient with chronic ulcerative colitis. *Am J Gastroenterol* Feb 1983;78(2):86–9.
85. Teague WG, Sutphen JL, Fechner RE. Desquamative interstitial pneumonitis complicating inflammatory bowel disease of childhood. *J Pediatr Gastroenterol Nutr* Aug 1985;4(4):663–7.
86. Balestra DJ, Balestra ST, Wasson JH. Ulcerative colitis and steroid-responsive, diffuse interstitial lung disease. *JAMA* Jul 1 1988;260(1):62–4.
87. McCulloch AJ, McEvoy A, Jackson JD, Jarvis EH. Severe steroid responsive pneumonitis associated with pyoderma gangrenosum and ulcerative colitis. *Thorax* Apr 1985;40(4):314–5.
88. Treiber G. Mycophenolate mofetil for therapy-resistant interstitial lung disease associated with ulcerative colitis. *Am J Gastroenterol* Dec 2000;95(12):3674–5.
89. Sargent D, Sessions JT, Fairman RP. Pulmonary vasculitis complicating ulcerative colitis. *South Med J* May 1985;78(5):624–5.
90. Senberg JI, Goldstein H, Korn AR, Ozeran RS, Rosen V. Pulmonary vasculitis—an uncommon complication of ulcerative colitis Report of a case. *N Engl J Med* Dec 19 1968;279(25):1376–7.
91. Forrest JA, Shearman DJ. Pulmonary vasculitis and ulcerative colitis. *Am J Dig Dis* May 1975;20(5):482–6.
92. Collins WJ, Bendig DW, Taylor WF. Pulmonary vasculitis complicating childhood ulcerative colitis. *Gastroenterology* Nov 1979;77(5):1091–3.
93. Kedziora JA, Wolff M, Chang J. Limited form of Wegener's granulomatosis in ulcerative colitis. *Am J Roentgenol Radium Ther Nucl Med* Sep 1975;125(1):127–33.
94. Stebbing J, Askin F, Fishman E, Stone J. Pulmonary manifestations of ulcerative colitis mimicking Wegener's granulomatosis. *J Rheumatol* Jul 1999;26(7):1617–21.
95. Yano S, Kobayashi K, Kato K, Nishimura K. A limited form of Wegener's granulomatosis with bronchiolitis obliterans organizing pneumonitis-like variant in an ulcerative colitis patient. *Intern Med* Nov 2002;41(11):1013–5.
96. Prekates AA, Orfanos SE, Routsis CJ, Ch Pantelidaki A, Roussos CS. Churg–Strauss syndrome occurring 30 years after the onset of ulcerative colitis. *Respir Care* Feb 2002;47(2):167–70.
97. Wechsler B, Couderc JL, Tucac G, Beaufils H, Godeau P. Crohn's disease associated with Wegener's granulomatosis. *Gastroenterol Clin Biol* May 1980;4(5):356–61.
98. Tuptler RH, McCuskey WH. Wegener granulomatosis of the colon: CT and histologic correlation. *J Comput Assist Tomogr* Mar–Apr 1991;15(2):314–6.



99. Temmesfeld-Wollbrueck B, Heinrichs C, Szalay A, Seeger W. Granulomatous gastritis in Wegener's disease: differentiation from Crohn's disease supported by a positive test for antineutrophil antibodies. *Gut* Apr 1997;**40**(4):550–3.
100. Haworth SJ, Pusey CD. Severe intestinal involvement in Wegener's granulomatosis. *Gut* Nov 1984;**25**(11):1296–300.
101. McNabb WR, Lennox MS, Wedzicha JA. Small intestinal perforation in Wegener's granulomatosis. *Postgrad Med J* Feb 1982;**58**(676):123–5.
102. Geraghty J, Mackay IR, Smith DC. Intestinal perforation in Wegener's granulomatosis. *Gut* Apr 1986;**27**(4):450–1.
103. Tokuda M, Kurata N, Daikuhara H, et al. Small intestinal perforation in Wegener's granulomatosis. *J Rheumatol* Apr 1989;**16**(4):547–9.
104. Sokol RJ, Farrell MK, McAdams AJ. An unusual presentation of Wegener's granulomatosis mimicking inflammatory bowel disease. *Gastroenterology* Aug 1984;**87**(2):426–32.
105. Camilleri M, Pusey CD, Chadwick VS, Rees AJ. Gastrointestinal manifestations of systemic vasculitis. *Q J Med* Spring 1983;**52**(206):141–9.
106. Wakefield AJ, Sankey EA, Dhillon AP, et al. Granulomatous vasculitis in Crohn's disease. *Gastroenterology* May 1991;**100**(5 Pt 1):1279–87.
107. Hardarson S, Labrecque DR, Mitros FA, Neil GA, Goeken JA. Antineutrophil cytoplasmic antibody in inflammatory bowel and hepatobiliary diseases High prevalence in ulcerative colitis, primary sclerosing cholangitis, and autoimmune hepatitis. *Am J Clin Pathol* Mar 1993;**99**(3):277–81.
108. Rump JA, Scholmerich J, Gross V, et al. A new type of perinuclear anti-neutrophil cytoplasmic antibody (p-ANCA) in active ulcerative colitis but not in Crohn's disease. *Immunobiology* Nov 1990;**181**(4–5):406–13.
109. Sanjeevi A, Roy HK. Necrobiotic nodules: a rare pulmonary manifestation of Crohn's disease. *Am J Gastroenterol* Apr 2003;**98**(4):941–3.
110. Faller M, Gasser B, Massard G, Pauli G, Quoix E. Pulmonary migratory infiltrates and pachypleuritis in a patient with Crohn's disease. *Respiration* 2000;**67**(4):459–63.
111. Patwardhan RV, Heilpern RJ, Brewster AC, Darrah JJ. Pleuropneumonitis: an extraintestinal complication of inflammatory bowel disease. Report of three cases and review of literature. *Arch Intern Med* Jan 1983;**143**(1):94–6.
112. Orii S, Chiba T, Nakadate I, et al. Pleuropneumonitis and disseminated intravascular coagulation in ulcerative colitis. *J Clin Gastroenterol* Mar 2001;**32**(3):251–4.
113. Stajer D, Gorjup V. Myopericarditis, pleuritis and deep venous thrombosis in ulcerative colitis masquerading as pulmonary embolism. *Intensive Care Med* Oct 1996;**22**(10):1134–5.
114. Karmy-Jones R, Chagpar A, Vallieres E, Hamilton S. Colobronchial fistula due to Crohn's disease. *Ann Thorac Surg* Aug 1995;**60**(2):446–8.
115. Mera A, Sugimoto M, Fukuda K, et al. Crohn's disease associated with colo-bronchial fistula. *Intern Med* Dec 1996;**35**(12):957–60.
116. Domej W, Kullnig P, Petritsch W, et al. Colobronchial fistula: a rare complication of Crohn's colitis. *Am Rev Respir Dis* Nov 1990;**142**(5):1225–7.
117. Singh D, Cole JC, Cali RL, Finical EJ, Proctor DD. Colobronchial fistula: an unusual complication of Crohn's disease. *Am J Gastroenterol* Dec 1994;**89**(12):2250–2.
118. Leichtling JJ, Garlock JH. Granulomatous colitis complicated by gastrocolic, duodenocolic, and colopulmonic fistulas. *Gastroenterology* Aug 1962;**43**:151–65.
119. Gumbo T, Rice TW, Mawhorter S. Recurrent pneumonia from an ileobronchial fistula complicating Crohn's disease. *J Clin Gastroenterol* Apr 2001;**32**(4):365–7.
120. Ghahremani GG, Gore RM, Breuer RI, Larson RH. Esophageal manifestations of Crohn's disease. *Gastrointest Radiol* 1982;**7**(3):199–203.
121. Cynn WS, Chon H, Gureghian PA, Levin BL. Crohn's disease of the esophagus. *Am J Roentgenol Radium Ther Nucl Med* Oct 1975;**125**(2):359–64.
122. Steel A, Dyer NH, Matthews HR. Cervical Crohn's disease with oesophago-pulmonary fistula. *Postgrad Med J* Sep 1988;**64**(755):706–9.
123. Bewig B, Manske I, Bottcher H, Bastian A, Nitsche R, Folsch UR. Crohn's disease mimicking sarcoidosis in bronchoalveolar lavage. *Respiration* 1999;**66**(5):467–9.
124. Smiejian JM, Cosnes J, Chollet-Martin S, et al. Sarcoid-like lymphocytosis of the lower respiratory tract in patients with active Crohn's disease. *Ann Intern Med* Jan 1986;**104**(1):17–21.
125. Yang AM, Pochapin MB. Treatment of complicated sarcoidosis with infliximab anti-tumor necrosis factor-alpha therapy. *Ann Intern Med* Jul 3 2001;**135**(1):27–31.
126. Alrashid AI, Brown RD, Mihalov ML, Sekosan M, Pastika BJ, Venu RP. Crohn's disease involving the lung: resolution with infliximab. *Dig Dis Sci* Aug 2001;**46**(8):1736–9.
127. Yang P, Tremaine WJ, Meyer RL, Prakash UB. Alpha1-antitrypsin deficiency and inflammatory bowel diseases. *Mayo Clin Proc* May 2000;**75**(5):450–5.
128. Elzouki AN, Eriksson S, Lofberg R, Nassberger L, Wieslander J, Lindgren S. The prevalence and clinical significance of alpha 1-antitrypsin deficiency (PiZ) and ANCA specificities (proteinase 3, BPI) in patients with ulcerative colitis. *Inflamm Bowel Dis* Nov 1999;**5**(4):246–52.
129. Bernstein CN, Blanchard JF, Houston DS, Wajda A. The incidence of deep venous thrombosis and pulmonary embolism among patients with inflammatory bowel disease: a population-based cohort study. *Thromb Haemostasis* Mar 2001;**85**(3):430–4.
130. Talbot RW, Heppell J, Dozois RR, Beart Jr RW. Vascular complications of inflammatory bowel disease. *Mayo Clin Proc* Feb 1986;**61**(2):140–5.
131. Novacek G, Miehsler W, Kapiotis S, Katzenschlager R, Speiser W, Vogelsang H. Thromboembolism and resistance to activated protein C in patients with inflammatory bowel disease. *Am J Gastroenterol* Mar 1999;**94**(3):685–90.
132. Koutroubakis IE. Role of thrombotic vascular risk factors in inflammatory bowel disease. *Dig Dis* 2000;**18**(3):161–7.
133. Quera R, Shanahan F. Thromboembolism—an important manifestation of inflammatory bowel disease. *Am J Gastroenterol* Oct 2004;**99**(10):1971–3.
134. Papa A, Danese S, Grillo A, Gasbarrini G, Gasbarrini A. Review article: inherited thrombophilia in inflammatory bowel disease. *Am J Gastroenterol* Jun 2003;**98**(6):1247–51.
135. Solem CA, Loftus EV, Tremaine WJ, Sandborn WJ. Venous thromboembolism in inflammatory bowel disease. *Am J Gastroenterol* Jan 2004;**99**(1):97–101.
136. Aichbichler BW, Petritsch W, Reicht GA, et al. Anti-cardiolipin antibodies in patients with inflammatory bowel disease. *Dig Dis Sci* Apr 1999;**44**(4):852–6.
137. Oldenburg B, Fijnheer R, van der Griend R, vanBerge-Henegouwen GP, Koningsberger JC. Homocysteine in inflammatory bowel disease: a risk factor for thromboembolic complications? *Am J Gastroenterol* Oct 2000;**95**(10):2825–30.
138. Bernstein CN, Wajda A, Blanchard JF. The clustering of other chronic inflammatory diseases in inflammatory bowel disease: a population-based study. *Gastroenterology* Sep 2005;**129**(3):827–36.
139. Kanazawa H, Yoshikawa J. A case-control study of bronchial asthma associated with ulcerative colitis: role of airway microvascular permeability. *Clin Exp Allergy* Nov 2005;**35**(11):1432–6.
